# Supplementary material for: Essential Oils from Zingiber striolatum Diels Attenuate Inflammatory Response and Oxidative Stress through Regulation of MAPK and NF-κB Signaling Pathways
Source: MDPI journal article supplement (doi:10.3390/antiox10122019), 2021-12-19
Supplement: s1 [file s1]

## Supplementary Materials

### Tables and Figures

**Table S1.** Geographic information of *Z. striolatum* collected from seven different habitats

| Sample<br>NO | Province | City        | Locality                             | Collection<br>Time | Storage<br>Location |
|--------------|----------|-------------|--------------------------------------|--------------------|---------------------|
| S1           | Sichuang | Yaan        | Mingshan                             | 2018.09            | School of           |
| S2           | Hunan    | Huaihua     | Yuanling                             | 2018.09            | Biomedical and      |
| S3           | Jiangsu  | Nantong     | Tongzhou                             | 2018.10            | Pharmatheutical     |
| S4           | Hunan    | Zhangjiajie | Sangzhi                              | 2018.10            | Sciences,           |
| S5           | Hubei    | Enshi       | Tujia and Miao Autonomous Prefecture | 2018.10            | Guangdong           |
| S6           | Hubei    | Shiyan      | Yunxi                                | 2018.09            | University of       |
| S7           | Anhui    | Liuan       | Dabieshan                            | 2018.09            | Technology          |
